# Supplementary material
Source: PubMed Central journal article supplement (PMC3880422)
Supplement: NIHMS538570-supplement-Supplemental.pdf [file NIHMS538570-supplement-Supplemental.pdf]

Supporting Information for:

# Development of an *in vitro* 3D tumor model to study therapeutic efficiency of an anti-cancer drug

Crystal S. Shin<sup>1</sup>, Bongseop Kwak<sup>2</sup>, Bumsoo Han<sup>2,3</sup>, and Kinam Park<sup>1,3\*</sup>

<sup>1</sup>Purdue University, Department of Industrial and Physical Pharmacy, West Lafayette, Indiana, 47907, U.S.A.

<sup>2</sup>Purdue University, Schools of Mechanical Engineering, West Lafayette, Indiana, 47907, U.S.A.

<sup>3</sup>Purdue University, Weldon School of Biomedical Engineering, West Lafayette, Indiana, 47907, U.S.A.

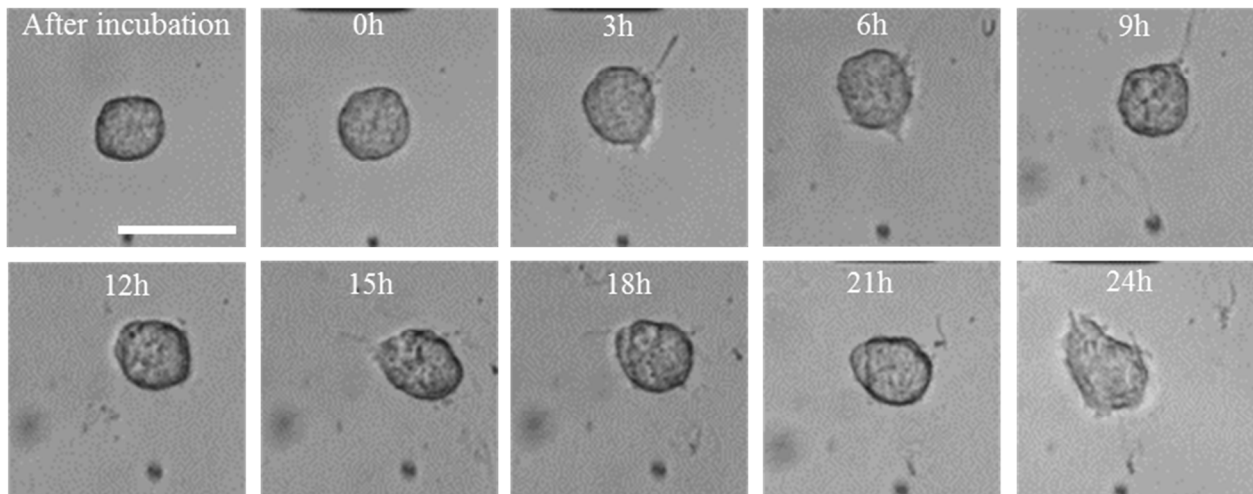

**Figure S1.** Enlarged time-lapse images of the MTS in the microfluidic channel over 24 hours of culture. Scale bar: 100 $\mu$ m

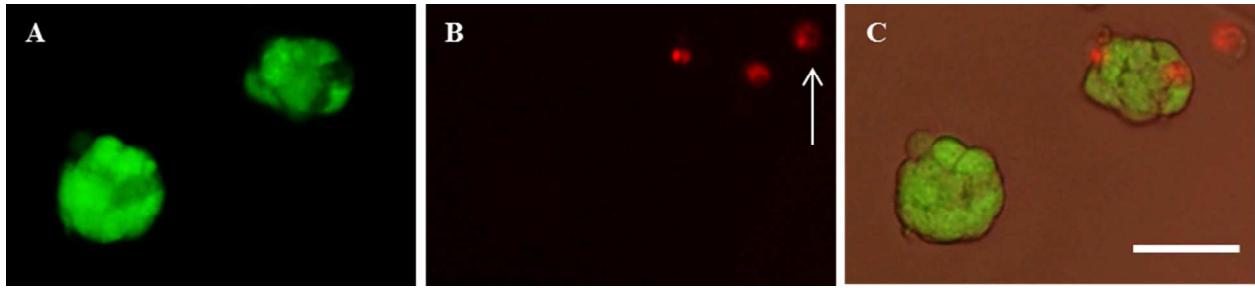

**Figure S2.** Confocal fluorescence images of the viability assay after treatment of DOX micelles in the MTS. (A) Live cells are shown in green. (B) No dead cell in the left MTS. Few stained dead cells in red and a white arrow indicates a dead single cell. (C) A composite image with bright field. Scale bar: 50 $\mu$ m

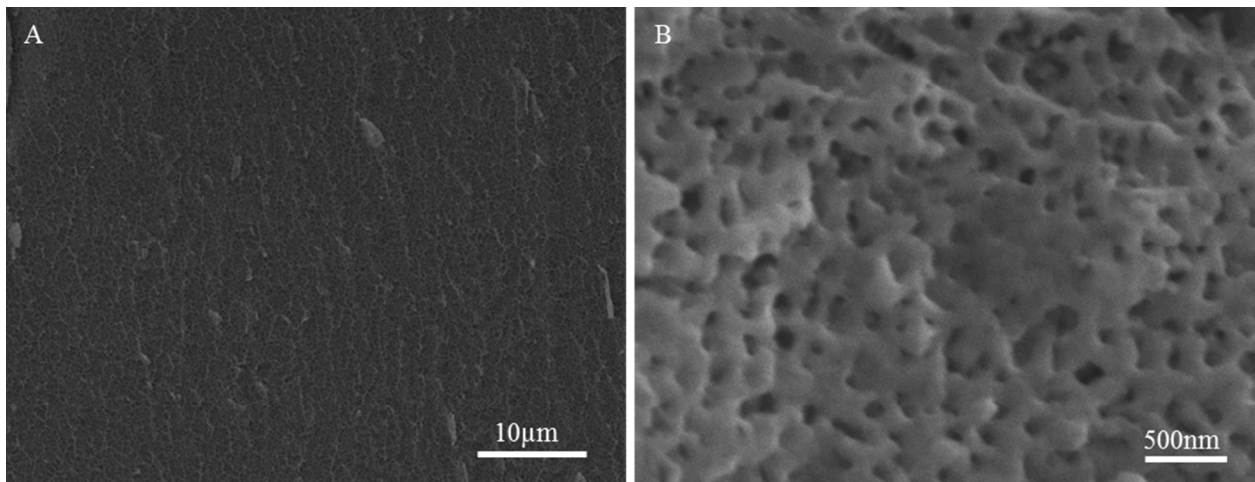

**Figure S3.** SEM images of the crosslinked hydrogel scaffold; (A) Overview of the surface of the hydrogel scaffold. (B) Porous network within the hydrogel scaffold.
